# Supplementary material for: Succinate metabolism in the retinal pigment epithelium uncouples respiration from ATP synthesis
Source: PubMed Central journal article supplement — Cell Rep. Author manuscript; Available in PMC 2022 Jul 4. (PMC9251713; doi:10.1016/j.celrep.2022.110917), 2022-06-07
Supplement: NIHMS1814642-supplement-1.pdf [file NIHMS1814642-supplement-1.pdf]

**Cell Reports, Volume 39**

**Supplemental information**

**Succinate metabolism in the retinal  
pigment epithelium uncouples  
respiration from ATP synthesis**

**Daniel T. Hass, Celia M. Bisbach, Brian M. Robbins, Martin Sadilek, Ian R. Sweet, and James B. Hurley**

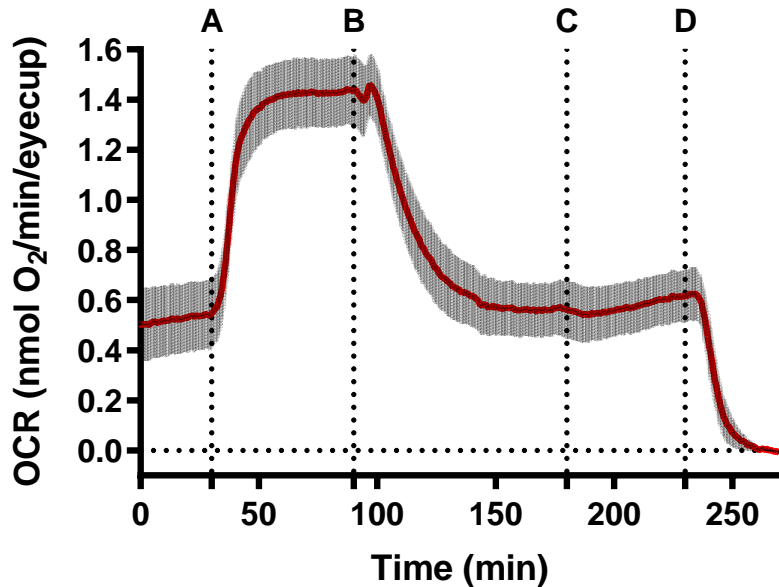

A: +5 mM succinate  
 B: -5 mM succinate  
 C: 500 μM *cis*-epoxysuccinate  
 D: KCN

**Figure S1. SUCNR1 Agonism is insufficient to increase oxygen consumption.**

Related to figure 1. We determined ex vivo O<sub>2</sub> consumption rate (OCR, mean ± SEM) in ex vivo eyecup tissue exposed to 5 mM glucose (baseline), (A) 5 mM glucose + 5 mM succinate, (B) 5 mM glucose alone (to show the succinate effect is reversible), (C) with 5 mM glucose and 500 μM *cis*-epoxysuccinate (a SUCNR1 agonist with 10x greater potency than succinate) (Geubelle et al., 2017), and (D) KCN (to confirm that OCR in this experiment was mitochondrial). SUCNR1 agonism did not clearly affect OCR while succinate did. This suggests that OCR is not a consequence of SUCNR1-dependant protein signaling (n=4).



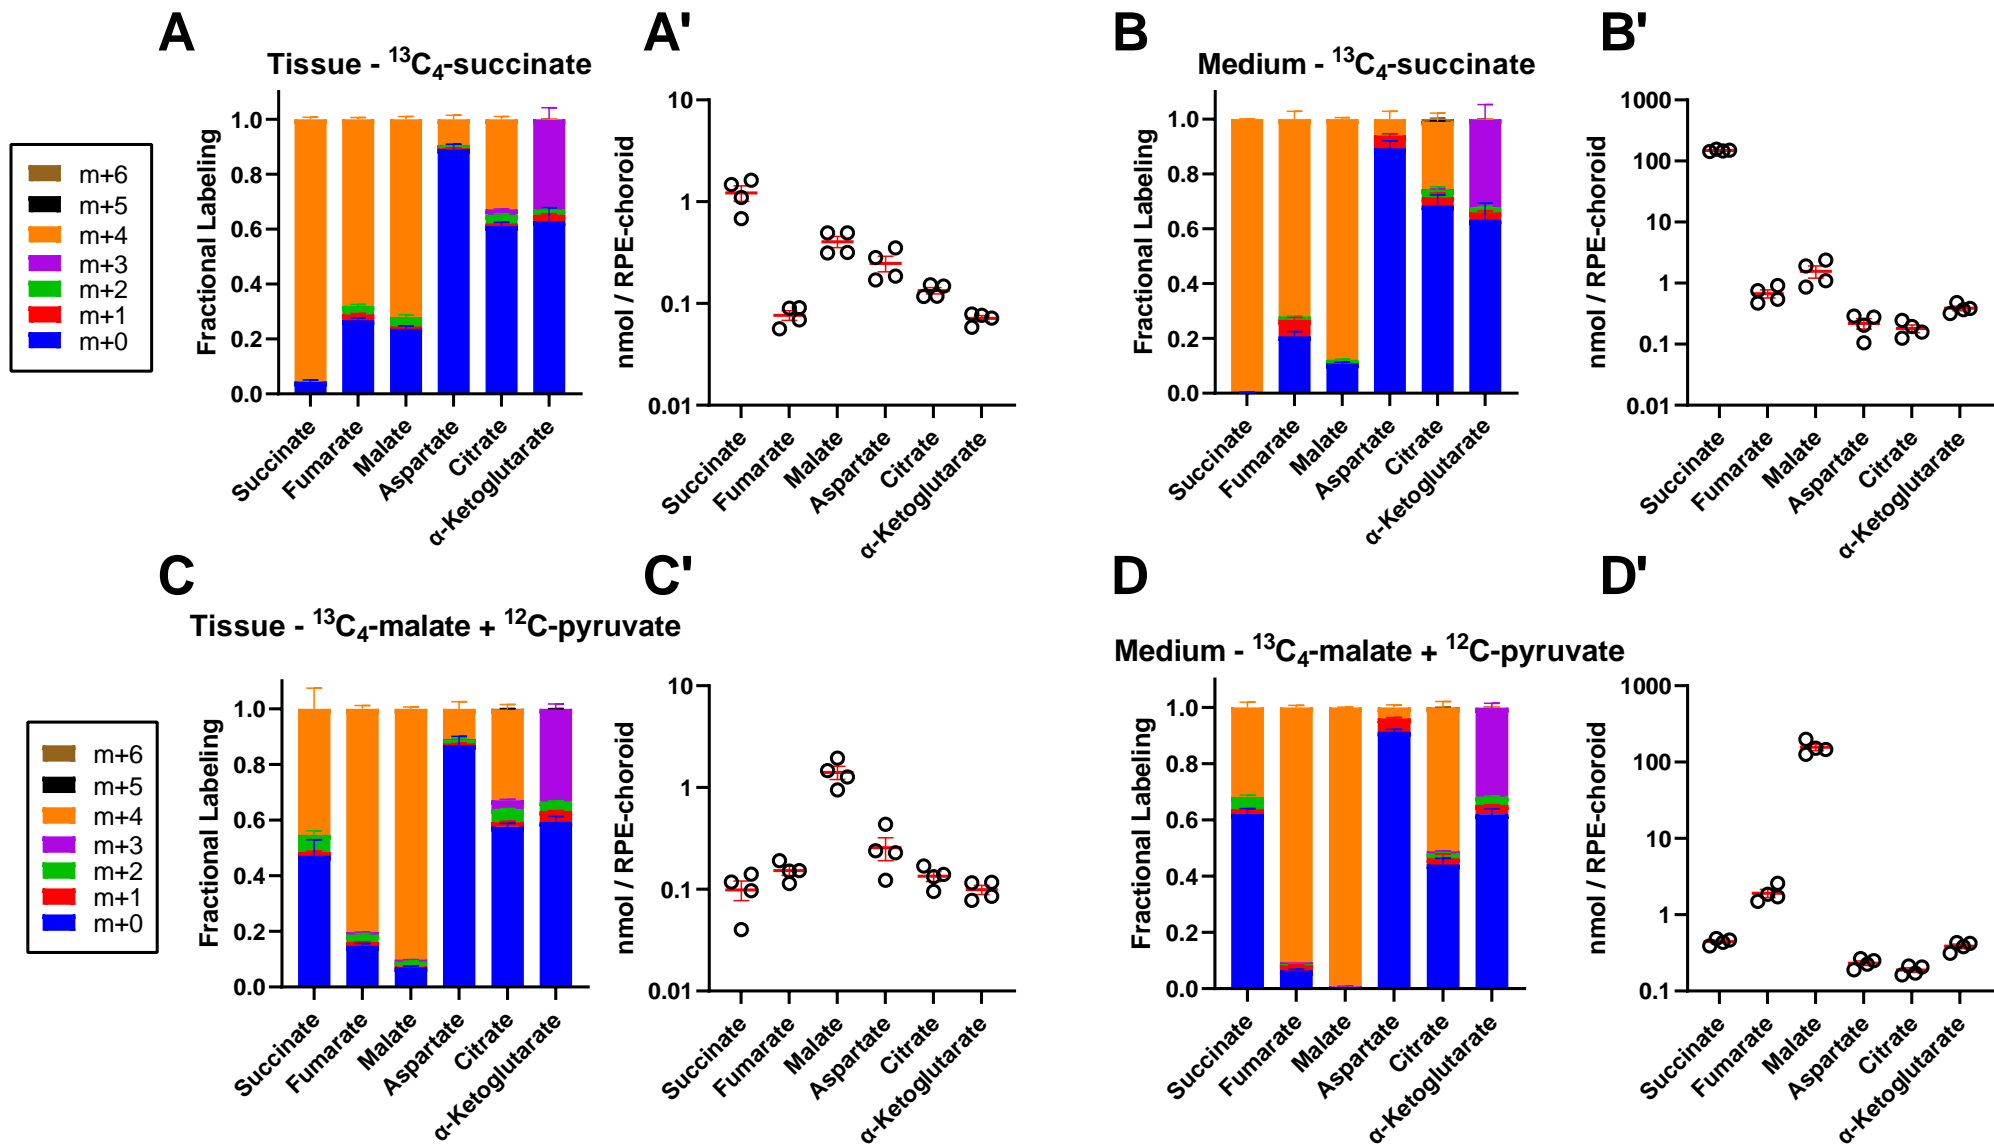

**Figure S3. TCA cycle metabolite amounts and isotopic distribution following a 10 minute incubation in  $^{13}\text{C}_4$ -succinate or  $^{13}\text{C}_4$ -malate/ $^{12}\text{C}$ -pyruvate.**

Related to figure 3. Each metabolic substrate was provided at 1 mM, in addition to 5 mM  $^{12}\text{C}$ -glucose. A-D indicate the fraction of an indicated metabolite pool carrying one  $^{13}\text{C}$  (m+1), two  $^{13}\text{C}$  (m+2), etc. A'-D' indicate the total amount of each metabolite quantified in the tissue or culture medium. A, A', B, and B' were tissue or media incubated in  $^{13}\text{C}_4$ -succinate. C, C', D, and D' were tissue or media incubated in  $^{13}\text{C}_4$ -malate and  $^{12}\text{C}$ -pyruvate. A, A', C, and C' are tissue samples, and B, B', D, and D' are matched media samples. All data show mean and SEM, with n=4 RPE-choroid tissue or media samples.

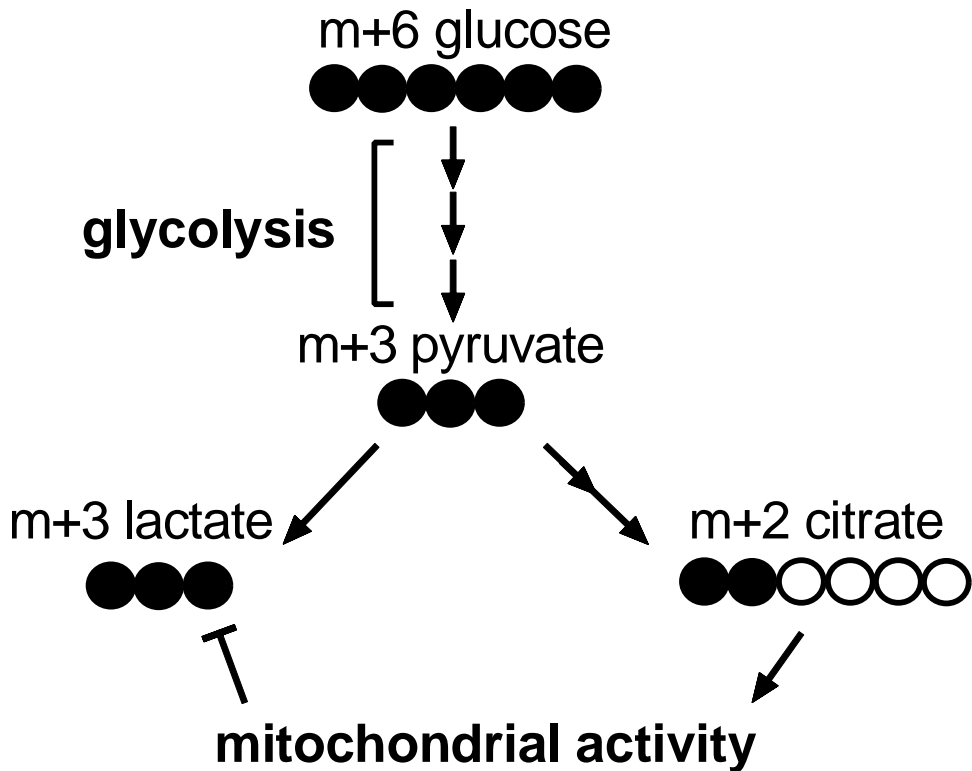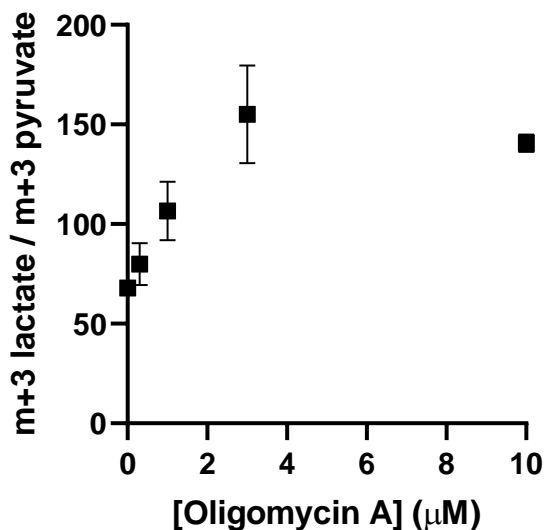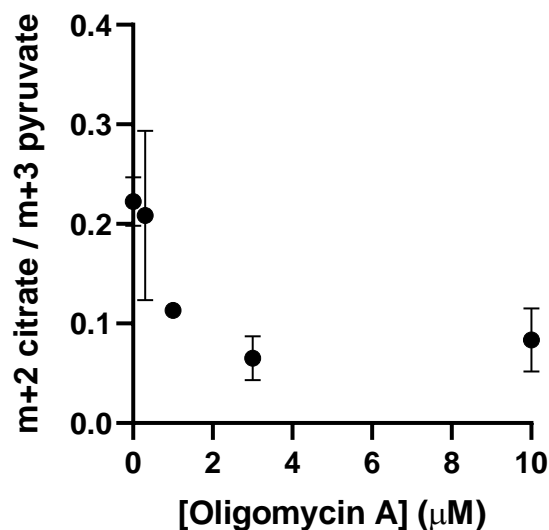

**Figure S4. Determination of oligomycin concentrations for eyecup tissue.** Related to figure 4. To determine a concentration of oligomycin that yields a maximal effect on mitochondrial activity, we incubated eyecup tissue in 5 mM  $U-^{13}\text{C}$ -glucose ( $m+6$  labeled) for 10 minutes along with 0, 0.3, 1, 3, or 10  $\mu\text{M}$  oligomycin. Glycolysis yields  $m+3$  pyruvate from  $m+6$  glucose, which can either become  $m+3$  lactate or acetyl-CoA then citrate (both  $m+2$ ). When mitochondria are active (without oligomycin inhibiting ATP-synthase), pyruvate is made into citrate. When mitochondria are inactive, pyruvate is not oxidized to acetyl-CoA and is instead reduced to lactate. We looked at formation of  $m+3$  labeled lactate /  $m+3$  pyruvate or  $m+2$  labeled citrate /  $m+3$  pyruvate as a function of [oligomycin], and at 3 or 10  $\mu\text{M}$  oligomycin these ratios reach a steady state that is distinct from untreated controls.

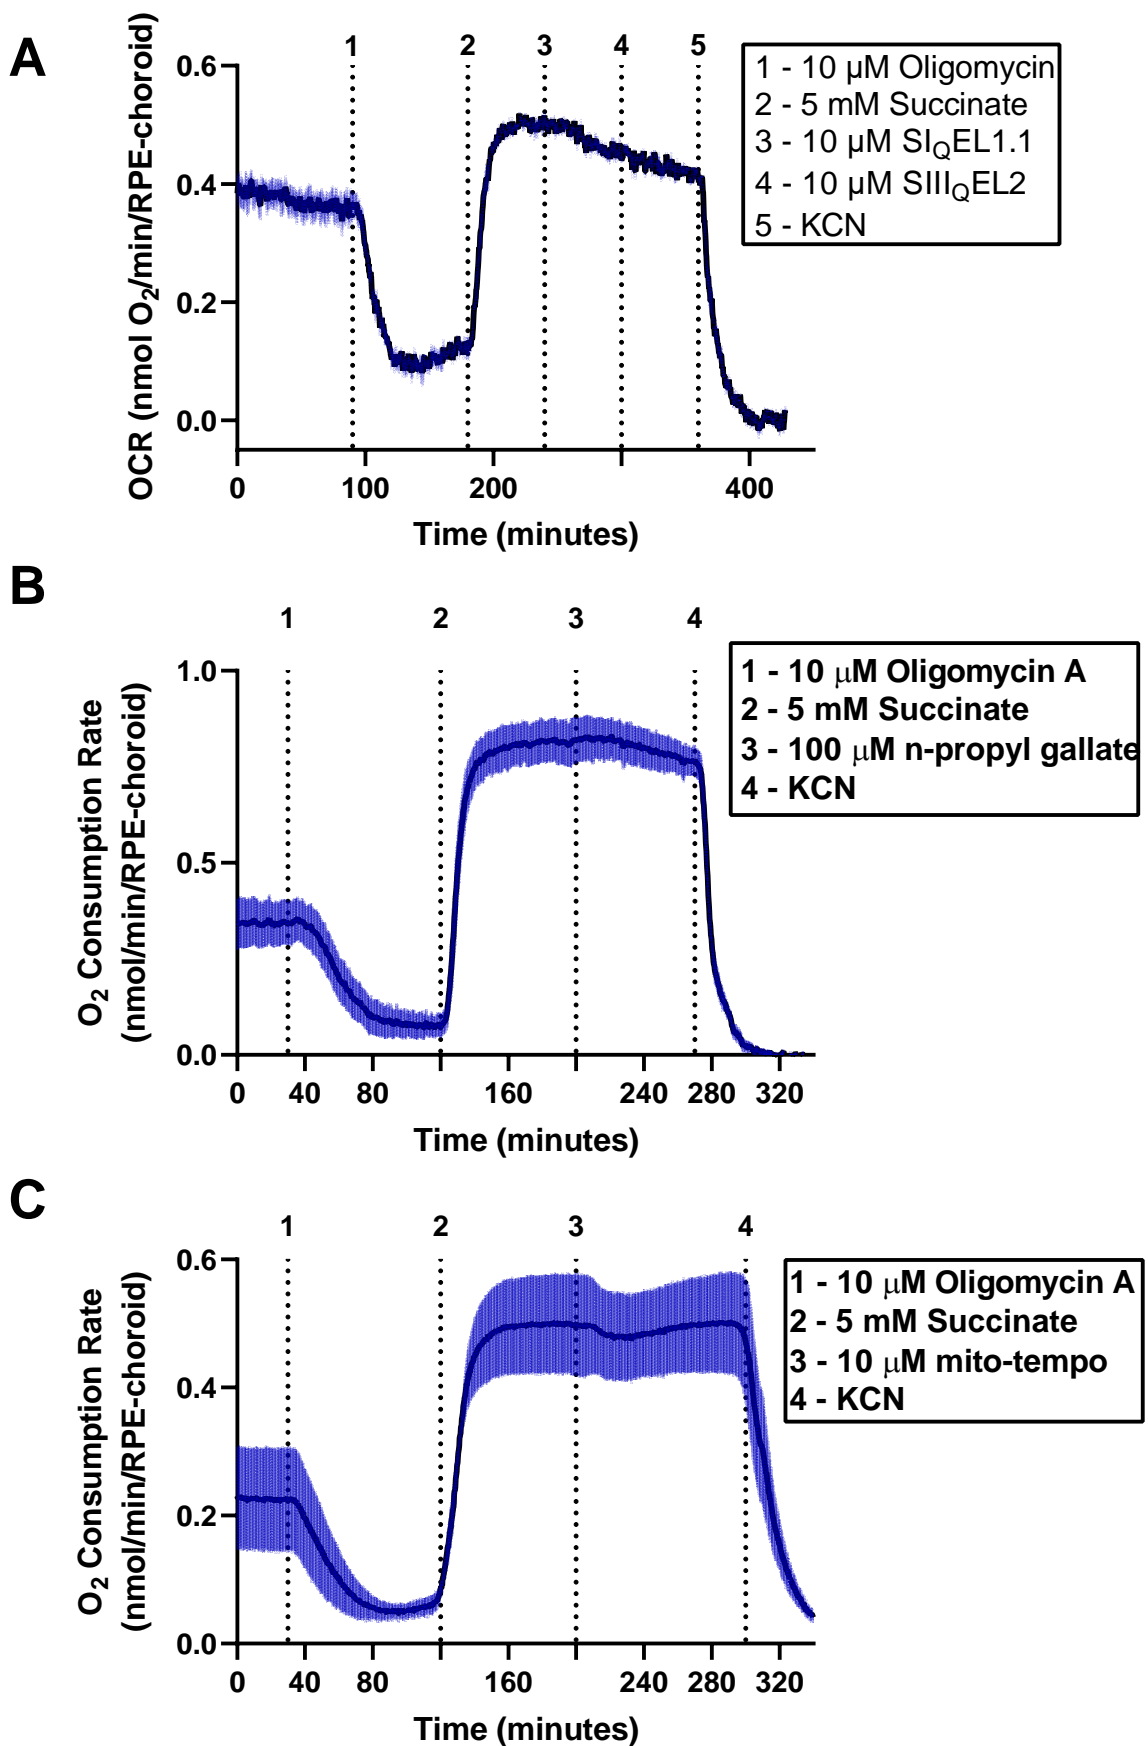

**Figure S5. Suppressors of electron leak and antioxidants do not clearly decrease succinate-driven uncoupled respiration.** Related to figure 4. OCR measurements of eyecup tissue exposed to oligomycin then succinate was subjected to either (a) suppressors of electron leak at sites I<sub>Q</sub> or III<sub>Q</sub> on the electron transport chain (n=3), (b) the antioxidant n-propyl gallate (n=4), or (c) the antioxidant mito-Tempo (n=4). For panel a, SI<sub>Q</sub>EL1.1 and SIII<sub>Q</sub>EL2 are provided as separate treatments with each including oligomycin and succinate but not the other suppressor of electron leak. For panels b and c, each treatment is provided in addition to past treatments. All experiments are performed in freshly dissected C57BL/6J mouse RPE-choroid preparations perfused with 5 mM glucose. Data are displayed as mean (black line)  $\pm$  SEM (blue).

**A**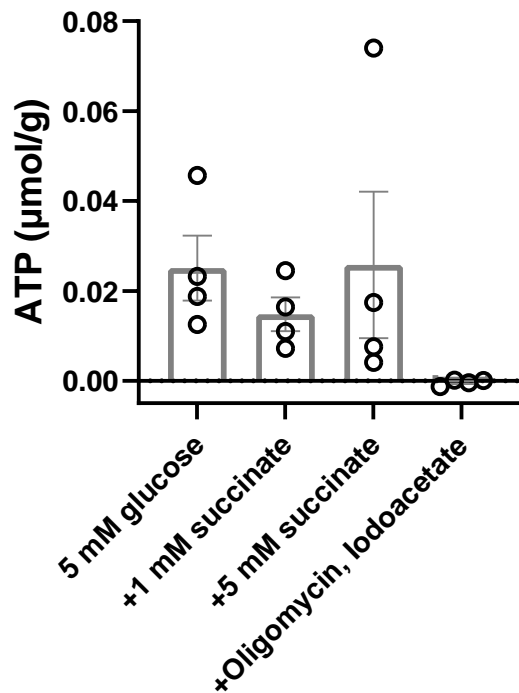**B**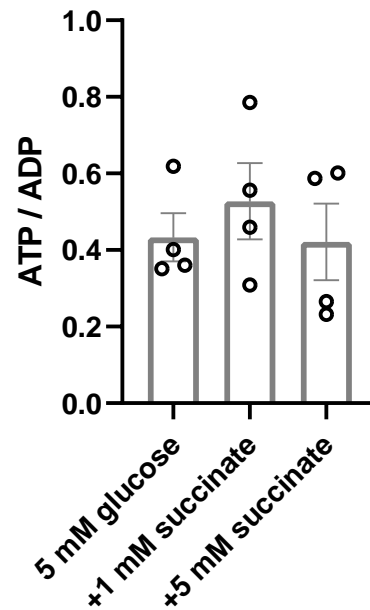

**Figure S6. Succinate does not alter metrics of intracellular energetic status.** Related to figure 4. Freshly dissected RPE-choroid preparations were incubated for 1 hour (at 37°C, 5% CO<sub>2</sub>) in KRB supplemented with 5 mM glucose (control), 5 mM glucose and 1 mM succinate, 5 mM glucose and 5 mM succinate, or 5 mM glucose, 5 mM succinate, 20 μM oligomycin, and 20 μM iodoacetate (- control). We lysed tissue in boiling dH<sub>2</sub>O to quench endogenous ATPase activity (Yang et al., 2002), then assessed ATP concentration and [ATP]/[ADP].
